# Supplementary material for: DNA methylation profiling identifies the HOXA11 gene as an early diagnostic and prognostic molecular marker in human lung adenocarcinoma
Source: PubMed Central journal article supplement (PMC5464853; doi:10.18632/oncotarget.16528), 2017-03-23
Supplement: oncotarget-08-33100-s001.pdf [file oncotarget-08-33100-s001.pdf]

## DNA methylation profiling identifies the HOXA11 gene as an early diagnostic and prognostic molecular marker in human lung adenocarcinoma

### Supplementary Materials

**Supplementary Table 1: Primers and probes of 16genes**

| Official symbol | Forward Primer Sequence         | Reverse Primer Sequence    | Probe Oligo Sequence           |
|-----------------|---------------------------------|----------------------------|--------------------------------|
| <i>CDH13</i>    | AATTTCGTTTCGTTTTGTGCGT          | CTACCCGTACCGAACGATCC       | AACGCAAAAACGCGCCCGACA          |
| <i>CDKN2A</i>   | GCGTTCGAGTGCGGA                 | CTCCCGAACACGTCGTACAC       | CAATTAACCTCCGCGCCGTAAAACAACAA  |
| <i>CDX2</i>     | GGTAATCGTCGTAGTTCGGGTATT        | ACTCCGTACGCCACTCTAACG      | CAACCTAACGCCGAAAACCTTCGTCA     |
| <i>EYA4</i>     | TGGATAGGATGGAAGTTTTCGCG         | AACTACCGACAACGCGACG        | CGCTCCGACCGTTCCCGACTT          |
| <i>HOXA1</i>    | GTTGTTGCGGCGATTGTA              | CGCGCAAAAACGCAACTT         | TACTCTTCTTCGCTCCAACACTCCAATCG  |
| <i>HOXA11</i>   | TTTTGTTTTTCGATTTTAGTCGGAAT      | TAATCAAATCACCGTACAATCGAAC  | ACCACCAAACAAACACATCCACGACTTCA  |
| <i>NEUROD1</i>  | GTTTTTTCGCGTGGGCGAAT            | CCGCGCTTAACATCACTAACTAAA   | CGCGCGACCACGACACGAAA           |
| <i>NEUROD2</i>  | GGTTTGGTATAGAGGTTGGTATTTCGT     | ACGAACGCCGACGTCTTC         | CGCCATACGAACCGCGAAACGAATATAA   |
| <i>ONECUT2</i>  | CGTTACGTATATCGCGCGG             | CAAAAACCTCTATATAAACGACGAAT | AACACGCAATTACGCGCTTTTATACGCA   |
| <i>OPCML</i>    | CGTTTCGAGGCGGTATCG              | CGAACCGCCGAAATTATCAT       | AACAACCTCCATCCCTAACCGCCACTTTCT |
| <i>PTPRN2</i>   | CGTTTTAATAGTTTCGGGTTTAGTTATAAGT | AACTACGCTTCTCAACGCCTC      | TAAAACGACCGCGTACTCGCCAAAAA     |
| <i>RASSF1</i>   | ATTGAGTTGCGGGAGTTGGT            | ACACGCTCCAACCGAATACG       | CCCTTCCAACGCGCCCA              |
| <i>SFRP1</i>    | GAATTCGTTTCGCGAGGGA             | AAACGAACCGCACTCGTTACC      | CCGTCACCGACGCGAAAACCAAT        |
| <i>TMEFF2</i>   | CGACGAGGAGGTGTAAGGATG           | CAACGCCTAACGAACGAACC       | TATAACTTCCGCGACCGCTCCTCCT      |
| <i>TWIST1</i>   | GTAGCGCGGCAACGT                 | AAACGCAACGAATCATAACCAAC    | CCAACGCACCCAATCGCTAAACGA       |

**Supplementary Table 2: Primer sets used for qRT-PCR**

| Official symbol | Forward Primer Sequence | Reverse Primer Sequence |
|-----------------|-------------------------|-------------------------|
| <i>CDKN2A</i>   | ATATGCCTTCCCCACTACC     | CGTGAGTGCTCACTCCAGAA    |
| <i>EYA4</i>     | AATTACGGACGCACTGAACC    | CTCACTTCTCCTGCCACTCC    |
| <i>HOXA11</i>   | TCCATTGAATCTCCTTTGC     | ATTTTCCTTGTGCCAGTTG     |
